# Supplementary material for: The Autonomy and Relatedness Inventory: An Analysis of the Psychometric Properties in Persons with Type 2 Diabetes
Source: Research Square preprint supplement (doi:10.21203/rs.3.rs-6993605/v1), 2025-07-22
Supplement: Supplementary file 1 [file 9fea59d41a3ceffc8f29448e.docx]

| **Table 1**  *Description of The Demographic Data and Clinical History of Study Participants (N=339) ** | | | | | | |
| --- | --- | --- | --- | --- | --- | --- |
| **Variable** | | |  |  |  |  |
|  | | | Min. | Max. | Mean | SD |
| Age | | | 29.0 | 85.0 | 59.6 | 11.10 |
| Age at Diagnosis | | | 16.00 | 84.0 | 48.09 | 10.43 |
|  | | | **Characteristic** | | | **Frequency (%)** |
| Sex | | Male | | | | 147 (43.4) |
|  | | Female | | | | 192 (56.6) |
|  | |  | | | |  |
| Marital status | | Married | | | | 312 (92.3) |
|  | | Divorce | | | | 9 (2.7) |
|  | | Widow | | | | 6 (1.8) |
|  | | Single | | | | 11(3.3) |
|  | |  | | | |  |
| Education | | <High school | | | | 109 (32.3) |
|  | | High school | | | | 86 (25.5) |
|  | | Community college | | | | 61 (18.1) |
|  | | ≥ Bachelor’s | | | | 81 (24.0) |
|  | |  | | | |  |
| Employment | Employed | | | | | 73 (22.0) |
|  | Not employed | | | | | 142 (42.8) |
|  | Retired | | | | | 117 (35.2) |
|  |  | | | | |  |
| Smoking | No | | | | | 278 (83.0) |
|  | Yes | | | | | 57 (17.0) |
|  |  | | | | |  |
| Comorbidities | Yes | | | | | 258 (76.1) |
|  | No | | | | | 81 (23.9) |
|  |  | | | | |  |
| Diabetes Medications | Insulin | | | | | 70(20.9) |
|  | Oral Hypoglycemic | | | | | 171(51) |
|  | Insulin & Oral Hypoglycemic | | | | | 94(28.1) |
|  |  | | | | | 53(15.7) |
| Diabetes Education | Yes | | | | | 284(84.3) |
|  | No | | | | |  |
| *Note:* Min.: observed minimum, Max.: observed maximum, SD: standard deviation  * The number of participant responses varied across the variables due to missing responses. | | | | | | |

| **Table 2**   | *Factor Loadings and Uniqueness* | | | | | --- | --- | --- | --- | |  | **Factor** | |  | |  | **1** | **2** | **Uniqueness** | | RARI2 | -0.453 | 0.310 | 0.681 | | RARI4 |  |  | 0.904 | | RARI6 |  |  | 0.910 | | RARI10 |  | 0.636 | 0.596 | | RARI14 |  | 0.652 | 0.524 | | RARI18 |  | 0.651 | 0.567 | | RARI20 |  | 0.383 | 0.791 | | RARI22 |  | 0.568 | 0.678 | | RARI26 |  | 0.613 | 0.544 | | RARI28 |  |  | 0.992 | | RARI30 |  | 0.683 | 0.526 | | ARI1 | 0.466 |  | 0.780 | | ARI3 | 0.829 |  | 0.313 | | ARI5 | 0.693 |  | 0.521 | | ARI7 | 0.776 |  | 0.375 | | ARI8 | 0.798 |  | 0.365 | | ARI9 | 0.829 |  | 0.311 | | ARI11 | 0.804 |  | 0.344 | | ARI12 | 0.828 |  | 0.286 | | ARI13 | 0.849 |  | 0.282 | | ARI15 | 0.829 |  | 0.314 | | ARI16 | 0.845 |  | 0.289 | | ARI17 | 0.861 |  | 0.261 | | ARI19 | 0.780 |  | 0.393 | | ARI21 | 0.783 |  | 0.385 | | ARI23 | 0.734 |  | 0.458 | | ARI24 |  |  | 0.983 | | ARI25 | 0.799 |  | 0.347 | | ARI27 | 0.850 |  | 0.270 | | ARI29 | 0.663 |  | 0.557 | | ARI31 | 0.681 |  | 0.520 | | ARI32 | 0.783 |  | 0.389 | | Note. 'Minimum residual' extraction method was used in combination with a 'oblimin' rotation | | | | |
| --- | --- | --- | --- | --- | --- | --- | --- | --- | --- | --- | --- | --- | --- | --- | --- | --- | --- | --- | --- | --- | --- | --- | --- | --- | --- | --- | --- | --- | --- | --- | --- | --- | --- | --- | --- | --- | --- | --- | --- | --- | --- | --- | --- | --- | --- | --- | --- | --- | --- | --- | --- | --- | --- | --- | --- | --- | --- | --- | --- | --- | --- | --- | --- | --- | --- | --- | --- | --- | --- | --- | --- | --- | --- | --- | --- | --- | --- | --- | --- | --- | --- | --- | --- | --- | --- | --- | --- | --- | --- | --- | --- | --- | --- | --- | --- | --- | --- | --- | --- | --- | --- | --- | --- | --- | --- | --- | --- | --- | --- | --- | --- | --- | --- | --- | --- | --- | --- | --- | --- | --- | --- | --- | --- | --- | --- | --- | --- | --- | --- | --- | --- | --- | --- | --- | --- | --- | --- | --- | --- | --- | --- | --- | --- | --- |

| **Table 3.**  *Confirmatory Factor Analysis Model Fit Indices* | | |
| --- | --- | --- |
| **Fit Index** | **Value** | **Criterion** |
| Chi-Square [χ² (df), p-value] | 271 (189), p<.001) | — |
| Scaled χ² (Satorra–Bentler) | 556 | — |
| Scaled Baseline χ² | 13,248 | — |
| Comparative Fit Index (CFI) | 0.999 | > 0.90 (good) |
| Tucker–Lewis Index (TLI) | 0.999 | > 0.90 (good) |
| NNFI (Bentler–Bonett Non‑normed Fit Index ) | 0.999 | > 0.90 (good) |
| Relative Noncentrality Index (RNI) | 0.999 | > 0.90 (good) |
| Normed Fit Index (NFI) | 0.997 | > 0.90 (good) |
| Relative Fit Index (RFI) | 0.996 | > 0.90 (good) |
| Incremental Fit Index (IFI) | 0.999 | > 0.90 (good) |
| Parsimony Normed Fit Index (PNFI) | 0.897 | > 0.50 (acceptable) |
| Standardized Root Mean Squared Residual (SRMR) | 0.035 | < 0.08 (acceptable) |
| Root Mean Squared Error  Approximate [RMSEA] (Scaled) | 0.080 | < 0.08 (acceptable) |
| 90% CI RMSEA | 0.073–0.088, p<.001 | p <.05 |
| Note. Df: degree of freedom, scaled indices refer to Satorra–Bentler adjustments. Criteria from Hu & Bentler (1999). | | |

| **Table 4**  *Pearson Product Correlations of The Study Variables* | | | | | |
| --- | --- | --- | --- | --- | --- |
|  | **MOS-SSS** | **ARI** | **Depression** | **Anxiety** | **Stress** |
| **MOS-SSS** | __ | .614* | -.278* | -.183* | -.212* |
| **ARI** |  | __ | -.255* | -.181* | -.244* |
| **Depression** |  |  | __ | .729* | .743* |
| **Anxiety** |  |  |  | __ | .693* |
| **Stress** |  |  |  |  | __ |
| * *p* < 0.01 | | | | | |
